# Supplementary material for: Out of hours palliative care in a rural area in the Midlands, England: a qualitative study of carers, caring for family members at the end of life and professionals
Source: Research Square preprint supplement (doi:10.21203/rs.3.rs-7934424/v1), 2025-12-11
Supplement: Supplementary file 1 [file 5465657573f8ad955bad432b.docx]

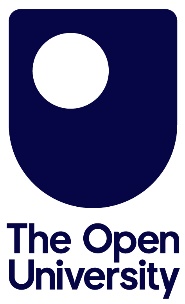


**Experience of Blythe Hospice Roaming Service: Carers**

**Interview Topic Guide**

**Introduction**

- Lead researcher to Introduce self and the research team and thank participants for attending.
- Ensure that they have all read through the participant information form and have signed the consent form. **If written consent has not been provided ensure verbal consent as per the participant information sheet. This consent will be recorded and noted.**
- **Nominated researcher: Please have the approved Distress Protocol to hand and follow in the event of distress exhibited during the interview.**
- Explain what the study is about including informing the forum theatre.
- Outline premise of focus group where we will have a conversation based around a number of questions/discussion points. Reiterate if there are any questions they don’t want to answer they don’t have to.
- Explain that the discussion will be audio recorded and will last about 90 minutes.
- Make it clear that it is possible for the participant to withdraw at any time, up until two weeks after the focus group (when all data will have been amalgamated) by letting you know. If they wish, we will not include their answers when this is written up.
- Explain that the focus group is completely confidential, and any information given today will be anonymous.
- Explain that when the audio recording is transcribed, the participant will be assigned a letter and a number so that it will not be possible to trace what is shared in the group
- Explain that the recording from today will be transcribed and the transcription will be stored on an encrypted memory stick and accessed by the immediate research team for analytical purposes.
- We will ask participants if they have any questions about the study or focus group before we start.
- Reassure that participants that the focus group can be paused or stopped at any time and that you appreciate that taking about a loved one’s death can be upsetting.
- Explain that they will be provided with a list of supportive organisations should the wish to refer to and that you will check in the following day to see how they are.

**Sections**

**About the participant**

**If I get some basic details and if I can start with asking if I may what your age is?**

**The next questions is about your gender identity. (Prompts below when required)**

Do you identify as:

- woman/girl
- man/boy
- transwoman/transgirl
- transman/transboy
- non-binary/genderqueer/agender/gender fluid
- don’t know
- prefer not to say
- other

**Can you tell me about your ethnicity?**

- "Asian, Asian British, Asian Welsh"
- "Black, Black British, Black Welsh, Caribbean or African"
- "Mixed or Multiple"
- "White"
- "Other ethnic group"

***Thank you***

**About their care giving role**

- How long have you been supporting/did support someone with a life-limiting illness?
- Can I ask who you provide/provided support for?
- What are/were your concerns as a carer about looking after someone with a life-limiting illness?

**About the Roaming Service**

- Who supports you and how do they help? / How did they help?
- What additional practical or emotional support have you received to help you in your caring role since contacting the Roaming Care Service?
- How long have you known about the Roaming Car Service and how did you make contact (referred by someone else or self-referral)?
- What was the reason for contacting Roaming Car Service?
- What support did you receive from the Roaming Car Service?
- What helped?
- What didn’t help?
- What would have made a difference?
- If you could have had something else, what would have helped?
- What was the impact of the support from the Roaming Car Service on your ability to care for your loved one?
- What was the impact on your ability to care for your loved one during the last days/hours of life and when they died because of the care you received from the Roaming Car Service?

**Thank you for your time, is there anything you would like to ask me?**

*Notify that will be in touch to see how they are the next day/time convenient for them re: post interview welfare check. Also reiterate the support organisation form that was sent out with the recruitment pack.*
