# Supplementary material for: Out of hours palliative care in a rural area in the Midlands, England: a qualitative study of carers, caring for family members at the end of life and professionals
Source: Research Square preprint supplement (doi:10.21203/rs.3.rs-7934424/v1), 2025-12-11
Supplement: Supplementary file 2 [file 5bbe473d56b0fb4b1c0af344.docx]

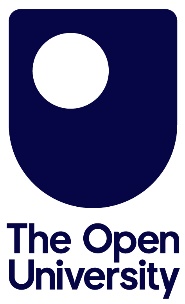


**Experience of Blythe Hospice Roaming Service: Staff**

**Focus Group Guide**

**Introduction**

- Introduce yourself and thank participant for attending.
- Ensure that they have read through the participant information form and have signed the consent form. **If written consent has not been provided ensure verbal consent as per the participant information sheet. This consent will be recorded and noted.**
- Explain what the study is about (we are interested in their experiences of Roaming Service). We have interviewed a small number of carers and we are interested to obtain the perspectives of professionals who work directly with Roaming Service and deliver the service itself.
- Outline premise of interview: where we will have a conversation based around a number of questions/discussion points.
- Explain that the discussion will be audio recorded and will last about an hour.
- Make it clear that it is possible for the participant to withdraw at any time, by letting you know. If they wish, we will not include their answers when this is written up.
- Explain that the interview is completely confidential and any information given today will be anonymous.
- Explain that when the audio recording is transcribed, the participant will be assigned a letter and a number so that it will not be possible to trace what they say to you.
- Explain that the recording from today will be transcribed and the transcription will be stored on an encrypted memory stick and accessed by the immediate research team for analytical purposes.
- We will ask the participant if they have any questions about the study or interview before we start.
- Reassure that the participant that the interview can be paused or stopped at any time and that you appreciate that taking about a loved one’s death can be upsetting.
- Explain that they will be provided with a list of supportive organisations should the wish to refer to and that you will check in the following day to see how they are.

**Sections**

**About the participant**

**About your role and what this involves (also collect information about how long in this role)**

***Thank you***

***Would like to ask some questions about the roaming service in relation to the people it supports***

- How are carers referred into the roaming car service?
- What have been their specific needs?
- What have been carers concerns about looking after someone at home who is palliative or at the end of life.
- Does the service respond to carer stress or carer breakdown, if so in what way?
- Are patients having a good death because of the support of the roaming care service? Can you say a bit more about how that happens?
- How do we manage demand from carers on our resources in terms of the roaming care service?
- What does the service do well?
- What could be improved?
- Do you think the service offers value for money ?
- How do you/ staff manage own wellbeing and coping abilities because of transference of carer stress onto themselves?

Thank you
